# Supplementary material
Source: Springer Nature journal article supplement (https://www.springermedizin.de/resource/supplementary/12879_2012_2419_MOESM2_ESM.pdf/9444548)
Supplement: MOESM2 [file 9444548]

|    |                                                           |    |                                         |
|----|-----------------------------------------------------------|----|-----------------------------------------|
| 1  | The District of Algoma Health Unit                        | 19 | Northwestern Health Unit                |
| 2  | Brant County Health Unit                                  | 20 | City of Ottawa Health Unit              |
| 3  | Durham Regional Health Unit                               | 21 | Oxford County Health Unit               |
| 4  | Elgin-St. Thomas Health Unit                              | 22 | Peel Regional Health Unit               |
| 5  | Grey Bruce Health Unit                                    | 23 | Perth District Health Unit              |
| 6  | Haldimand-Norfolk Health Unit                             | 24 | Peterborough County-City Health Unit    |
| 7  | Haliburton, Kawartha, Pine Ridge District Health Unit     | 25 | Porcupine Health Unit                   |
| 8  | Halton Regional Health Unit                               | 26 | Renfrew County and District Health Unit |
| 9  | City of Hamilton Health Unit                              | 27 | The Eastern Ontario Health Unit         |
| 10 | Hastings and Prince Edward Counties Health Unit           | 28 | Simcoe Muskoka District Health Unit     |
| 11 | Huron County Health Unit                                  | 29 | Sudbury and District Health Unit        |
| 12 | Chatham-Kent Health Unit                                  | 30 | Thunder Bay District Health Unit        |
| 13 | Kingston, Frontenac, and Lennox and Addington Health Unit | 31 | Timiskaming Health Unit                 |
| 14 | Lambton Health Unit                                       | 32 | Waterloo Health Unit                    |

|    |                                                  |    |                                        |
|----|--------------------------------------------------|----|----------------------------------------|
| 15 | Leeds, Grenville and Lanark District Health Unit | 33 | Wellington-Dufferin-Guelph Health Unit |
| 16 | Middlesex-London Health Unit                     | 34 | Windsor-Essex County Health Unit       |
| 17 | Niagara Regional Area Health Unit                | 35 | York Regional Health Unit              |
| 18 | North Bay Parry Sound District Health Unit       | 36 | City of Toronto Health Unit            |
